# Supplementary material for: Combined Optimization of Codon Usage and Glycine Supplementation Enhances the Extracellular Production of a β-Cyclodextrin Glycosyltransferase from Bacillus sp. NR5 UPM in Escherichia coli
Source: MDPI journal article supplement (doi:10.3390/ijms21113919), 2020-05-30
Supplement: s1 [file s1]

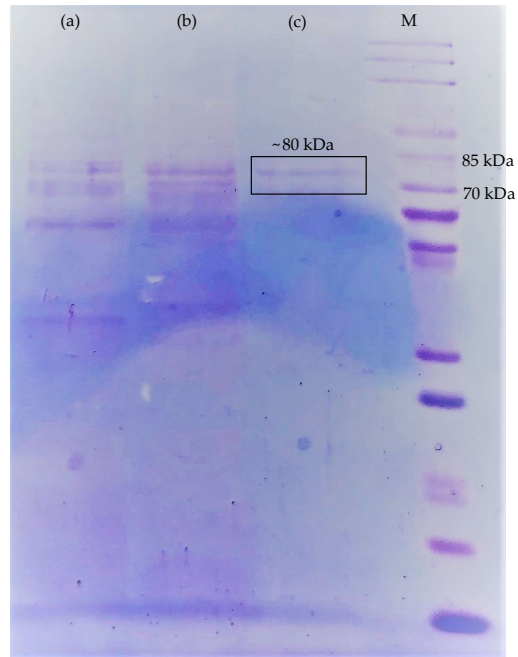

**Figure S1.** SDS-PAGE analysis of the crude and purified recombinant proteins: **(a)** crude recombinant protein; **(b)** recombinant protein following diafiltration; **(c)** purified protein following affinity chromatography and concentrated via ultrafiltration. All protein samples were loaded with the total concentration of 30  $\mu$ g for each well. M: PageRuler unstained protein leader (Thermo Fisher Scientific, USA).
